# Supplementary material for: Sequencing Biodegradable and Potentially Biobased Polyesteramide of Sebacic Acid and 3-Amino-1-propanol by MALDI TOF-TOF Tandem Mass Spectrometry
Source: MDPI journal article supplement (doi:10.3390/polym14081500), 2022-04-07
Supplement: s1 [file s1]

Supplemental Information:

## Sequencing Biodegradable and Potentially Biobased Polyesteramide of Sebacic Acid and 3-Amino-1-Propanol by MALDI TOF-TOF Tandem Mass Spectrometry

Paola Rizzarelli <sup>1,\*</sup>, Stefania La Carta <sup>2</sup>, Emanuele Francesco Mirabella <sup>1</sup>, Marco Rapisarda <sup>1</sup> and Giuseppe Impallomeni <sup>1</sup>

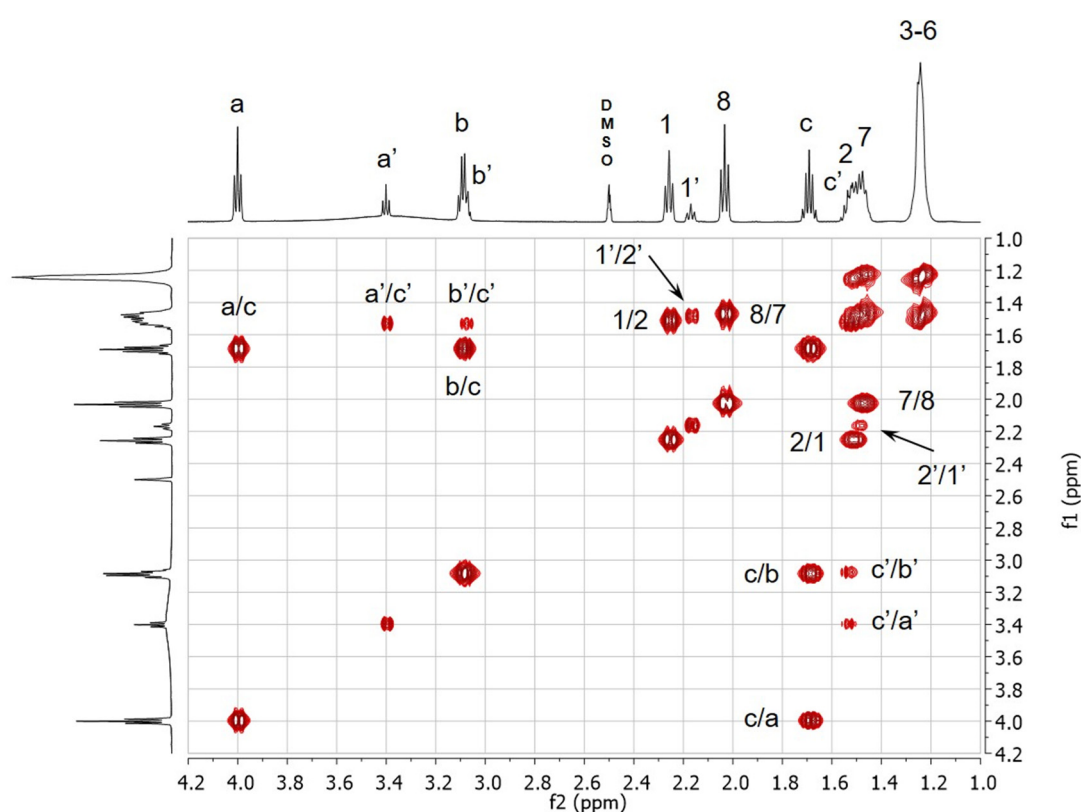

**Figure S1.** Partial g-COSY spectrum of PEA-Pro in 6d-DMSO at 50 °C showing the 4.2 – 1.0 ppm range.

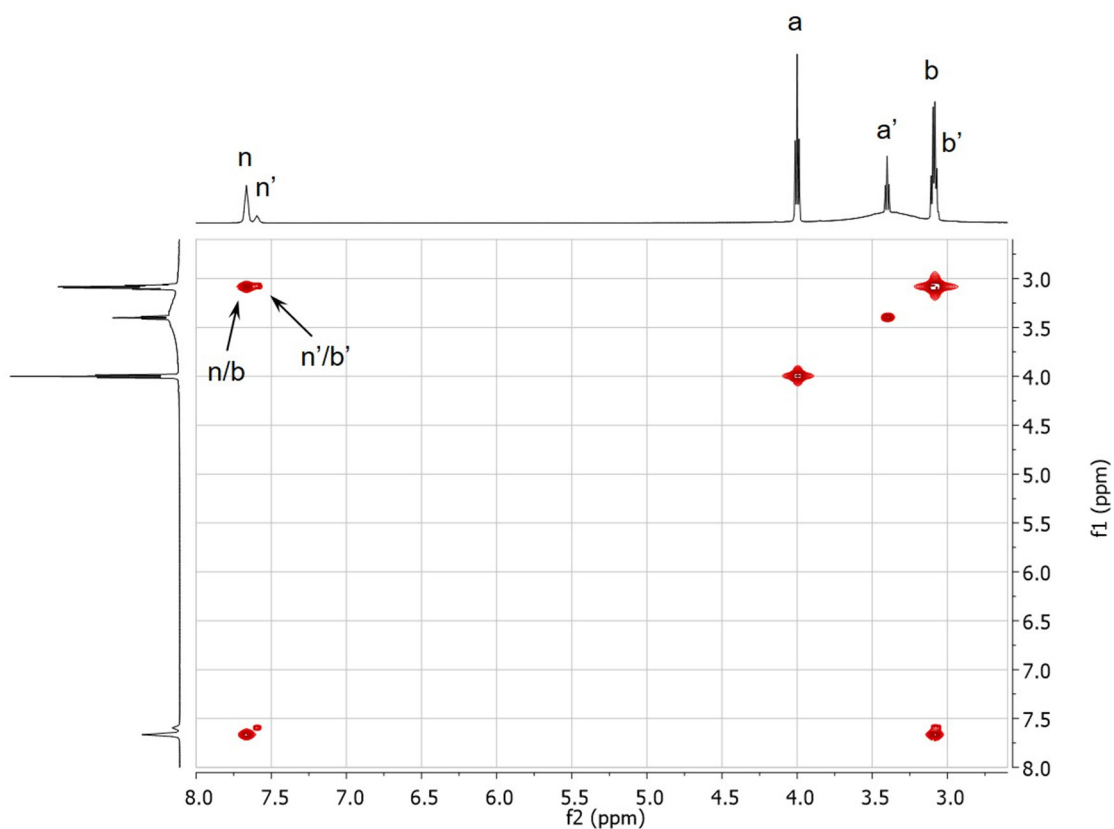

**Figure S2.** Partial g-COSY spectrum of PEA-Pro in 6d-DMSO at 50°C showing the 8.0 – 2.6 ppm range.

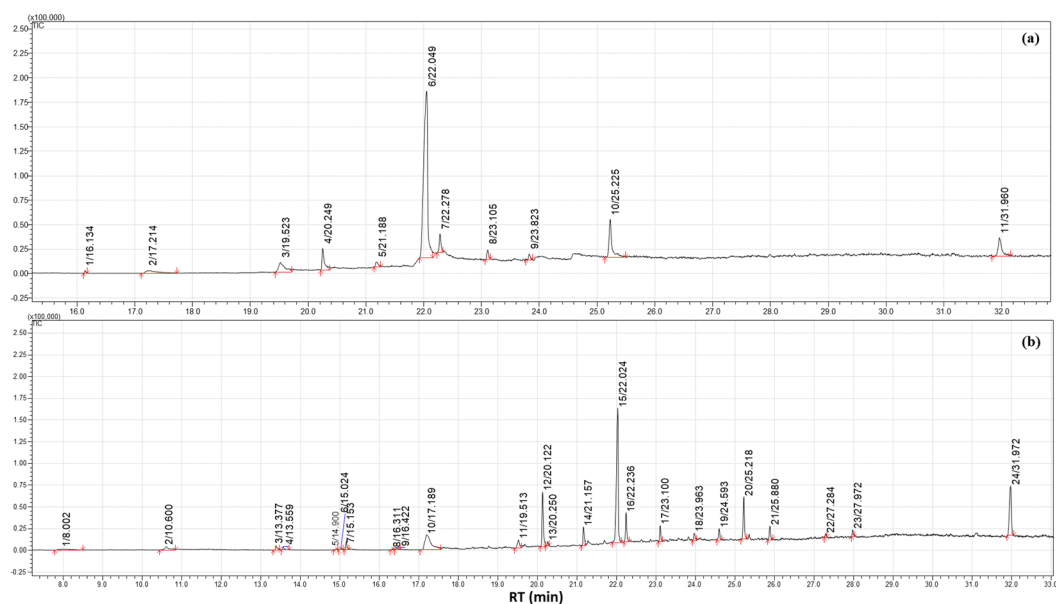

**Figure S3.** Total ion current (TIC) trace of pyrolysis products of PEA-Pro at (a) 350 °C and (b) 400 °C.

**Table S1.** Structure assignments of product ions appearing in the MALDI-TOF/TOF-MS/MS spectra of the PEA-Pro sample (precursor ions at  $m/z$  1189.8, 1228.8, 1246.8 and 1303.9).

| Structure                                                                                                               | n | [M+Na <sup>+</sup> ] | [M+H <sup>+</sup> ] |
|-------------------------------------------------------------------------------------------------------------------------|---|----------------------|---------------------|
| $\text{HO}-\left[\text{U}\right]_n-\text{CO}(\text{CH}_2)_8\text{COOH}$                                                 | 4 | 1189.78              |                     |
|                                                                                                                         | 3 | 948.61               |                     |
|                                                                                                                         | 2 | 707.44               | /                   |
|                                                                                                                         | 1 | 466.27               |                     |
|                                                                                                                         | 0 | 225.10               |                     |
| $\text{H}_2\text{C}=\text{CHCH}_2\text{NH}-\left[\text{U}\right]_n-\text{CO}(\text{CH}_2)_8\text{COOH}$                 | 4 | 1228.83              |                     |
|                                                                                                                         | 3 | 987.66               |                     |
|                                                                                                                         | 2 | 746.48               | /                   |
|                                                                                                                         | 1 | 505.32               |                     |
|                                                                                                                         | 0 | 264.18               |                     |
| 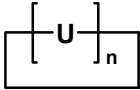                                       | 5 | 1228.83              |                     |
|                                                                                                                         | 4 | 987.66               |                     |
|                                                                                                                         | 3 | 746.48               |                     |
|                                                                                                                         | 2 | 505.32               |                     |
|                                                                                                                         | 1 | 264.18               | 242.18              |
| $\text{CH}_2=\text{CHCO}-\left[\text{U}\right]_n-\text{OH}$                                                             | 4 | 1059.83              |                     |
|                                                                                                                         | 3 | 818.50               |                     |
|                                                                                                                         | 2 | 577.37               | /                   |
| $\text{HCO}-\left[\text{U}\right]_n-\text{OCH}=\text{CH}_2$                                                             | 1 | 336.21               |                     |
|                                                                                                                         | 0 | 95.04                |                     |
| $\text{CH}_2=\text{CHCH}_2\text{CO}-\left[\text{U}\right]_n-\text{OH}$                                                  | 3 | 832.52               |                     |
|                                                                                                                         | 2 | 591.35               |                     |
|                                                                                                                         | 1 | 350.18               | /                   |
| $\text{HCO}-\left[\text{U}\right]_n-\text{OCH}_2\text{CH}=\text{CH}_2$                                                  | 0 | 109.01               |                     |
| $\text{CH}_3\text{CO}-\left[\text{U}\right]_n-\text{OCH}=\text{CH}_2$                                                   |   |                      |                     |
|                                                                                                                         |   |                      |                     |
|                                                                                                                         |   |                      |                     |
| $\text{CH}_2=\text{CH}(\text{CH}_2)_2\text{CO}-\left[\text{U}\right]_n-\text{OH}$                                       | 3 | 846.82               |                     |
|                                                                                                                         | 2 | 605.63               |                     |
|                                                                                                                         | 1 | 364.34               | /                   |
| $\text{CH}_2=\text{CHCO}-\left[\text{U}\right]_n-\text{OCH}_2\text{CH}_3$                                               | 0 | 123.09               |                     |
| $\text{CH}_2=\text{CHCH}_2\text{NH}-\left[\text{U}\right]_n-\text{H}$                                                   | 4 | 1044.63              | 1022.62             |
|                                                                                                                         | 3 | 803.52               | 781.48              |
|                                                                                                                         | 2 | 562.38               | 540.40              |
|                                                                                                                         | 1 | 321.22               | 299.23              |
|                                                                                                                         | 0 | 80.59                | 58.04               |
| $\text{CH}_2=\text{CH}_2\text{CO}-\left[\text{U}\right]_n-\text{O}(\text{CH}_2)_3\text{NHCO}(\text{CH}_2)_4\text{CH}_3$ | 2 | 744.47               |                     |
|                                                                                                                         | 1 | 503.30               | /                   |
|                                                                                                                         | 0 | 262.13               |                     |
| $\text{HOCO}(\text{CH}_2)_8\text{CO}-\left[\text{U}\right]_n-\text{NH}_2$                                               | 1 | 465.30               | /                   |
|                                                                                                                         | 0 | 224.15               |                     |
| $\text{HO}-\left[\text{U}\right]_n-\text{H}$                                                                            | 3 | 1005.68              |                     |
|                                                                                                                         | 2 | 764.50               | /                   |
|                                                                                                                         | 1 | 523.34               |                     |
|                                                                                                                         | 0 | 282.17               |                     |
|                                                                                                                         | 4 | 1172.80              |                     |
| $\text{CH}_2=\text{CH}(\text{CH}_2)_4\text{CO}-\left[\text{U}\right]_n-\text{O}(\text{CH}_2)_3\text{NH}_2$              | 3 | 931.74               |                     |
|                                                                                                                         | 2 | 690.53               | /                   |
|                                                                                                                         | 1 | 449.33               |                     |
|                                                                                                                         | 0 | 208.10               |                     |
| $\text{CH}_2=\text{CH}(\text{CH}_2)_3\text{CO}-\left[\text{U}\right]_n-\text{O}(\text{CH}_2)_3\text{NH}_2$              |   |                      |                     |
|                                                                                                                         |   |                      |                     |
|                                                                                                                         |   |                      |                     |
| $\text{CH}_3(\text{CH}_2)_4\text{CO}-\left[\text{U}\right]_n-\text{NH}(\text{CH}_2)_2\text{CHO}$                        | 3 | 917.60               |                     |
|                                                                                                                         | 2 | 676.49               | /                   |
|                                                                                                                         | 1 | 435.32               |                     |
| $\text{CH}_2=\text{CHCH}_2\text{CO}-\left[\text{U}\right]_n-\text{O}(\text{CH}_2)_3\text{NHCHO}$                        | 0 | 194.09               |                     |
|                                                                                                                         |   |                      |                     |

| Structure                                                                                                   | n | [M+Na <sup>+</sup> ] | [M+H <sup>+</sup> ] |
|-------------------------------------------------------------------------------------------------------------|---|----------------------|---------------------|
| $\text{CH}_2=\text{CHCO}-\left[\text{U}\right]_n-\text{O}(\text{CH}_2)_3\text{NHCOCH}_3$                    | 3 | 903.59               |                     |
| $\text{CH}_2=\text{CH}(\text{CH}_2)_2\text{CO}-\left[\text{U}\right]_n-\text{O}(\text{CH}_2)_3\text{NH}_2$  | 2 | 662.42               | /                   |
|                                                                                                             | 1 | 421.30               |                     |
|                                                                                                             | 0 | 180.10               |                     |
| $\text{CH}_2=\text{CHCH}_2\text{CO}-\left[\text{U}\right]_n-\text{O}(\text{CH}_2)_3\text{NH}_2$             | 3 | 889.74               | /                   |
|                                                                                                             | 2 | 648.40               |                     |
|                                                                                                             | 1 | 407.29               |                     |
| $\text{CH}_3(\text{CH}_2)_2\text{CO}-\left[\text{U}\right]_n-\text{NH}(\text{CH}_2)\text{CHO}$              | 0 | 166.09               |                     |
| $\text{CH}_2=\text{CHCO}-\left[\text{U}\right]_n-\text{O}(\text{CH}_2)_3\text{NH}_2$                        | 4 | 1116.73              | /                   |
|                                                                                                             | 3 | 875.61               |                     |
|                                                                                                             | 2 | 634.49               |                     |
| $\text{CH}_3(\text{CH}_2)_5\text{CO}-\left[\text{U}\right]_n-\text{NH}_2$                                   | 1 | 393.28               | /                   |
|                                                                                                             | 0 | 152.06               |                     |
| $\text{HOCO}(\text{CH}_2)_8\text{CO}-\left[\text{U}\right]_n-\text{NH}(\text{CH}_2)_2\text{CHO}$            | 3 | 1003.76              |                     |
|                                                                                                             | 2 | 762.51               | /                   |
| $\text{CH}_3\text{CH}_2\text{O}-\left[\text{U}\right]_n-\text{CO}(\text{CH}_2)_8\text{CONHCH}_2\text{CH}_3$ | 1 | 521.36               |                     |
|                                                                                                             | 0 | 280.17               |                     |
| $\text{CH}_2=\text{CHCH}_2\text{NH}-\left[\text{U}\right]_n-\text{CO}(\text{CH}_2)_8\text{CONHC}$           | 3 | 1026.91              | /                   |
|                                                                                                             | 2 | 785.69               |                     |
|                                                                                                             | 1 | 544.36               |                     |
|                                                                                                             | 0 | 303.19               | /                   |
| $\text{CH}_2=\text{CH}(\text{CH}_2)_4\text{CO}-\left[\text{U}\right]_n-\text{NHCH}_2\text{CH}=\text{CH}_2$  | 3 | 913.62               |                     |
|                                                                                                             | 2 | 672.45               |                     |
| $\text{CH}_2=\text{CH}(\text{CH}_2)_5\text{CO}-\left[\text{U}\right]_n-\text{NHCH}=\text{CH}_2$             | 1 | 431.28               | /                   |
|                                                                                                             | 0 | 190.11               |                     |
|                                                                                                             | 4 | 1089.80              |                     |
| $\text{CH}_2=\text{CHCH}_2\text{CO}-\left[\text{U}\right]_n-\text{NHCH}=\text{CH}_2$                        | 3 | 857.68               | /                   |
|                                                                                                             | 2 | 616.40               |                     |
| $\text{CH}_2=\text{CHCO}-\left[\text{U}\right]_n-\text{NHCH}_2\text{CH}=\text{CH}_2$                        | 1 | 375.27               |                     |
|                                                                                                             | 0 | 134.08               | /                   |
|                                                                                                             | 4 | 1060.79              |                     |
| $\text{H}-\left[\text{U}\right]_n-\text{NH}(\text{CH}_2)\text{CHO}$                                         | 3 | 819.59               |                     |
|                                                                                                             | 2 | 578.44               | /                   |
|                                                                                                             | 1 | 337.25               |                     |
|                                                                                                             | 0 | 96.47                |                     |
| $\text{CH}_2=\text{CH}(\text{CH}_2)_6\text{CO}-\left[\text{U}\right]_n-\text{NH}_2$                         |   |                      | /                   |
| $\text{CH}_3(\text{CH}_2)_5\text{CO}-\left[\text{U}\right]_n-\text{NHCH}=\text{CH}_2$                       | 2 | 660.54               |                     |
|                                                                                                             | 1 | 419.30               |                     |
| $\text{CH}_3(\text{CH}_2)_4\text{CO}-\left[\text{U}\right]_n-\text{NHCH}_2\text{CH}=\text{CH}_2$            | 0 | 178.11               |                     |
| $\text{CH}_2=\text{CH}(\text{CH}_2)_2\text{CO}-\left[\text{U}\right]_n-\text{NH}(\text{CH}_2)\text{CHO}$    |   |                      | /                   |
| $\text{CH}_2=\text{CH}(\text{CH}_2)_4\text{CO}-\left[\text{U}\right]_n-\text{NH}_2$                         |   |                      |                     |
| $\text{CH}_2=\text{CHCO}-\left[\text{U}\right]_n-\text{NH}(\text{CH}_2)_2\text{CHO}$                        | 2 | 632.42               |                     |
|                                                                                                             | 1 | 391.25               | /                   |
| $\text{CH}_3(\text{CH}_2)_2\text{CO}-\left[\text{U}\right]_n-\text{NHCH}_2\text{CH}=\text{CH}_2$            | 0 | 150.08               |                     |
| $\text{CH}_3(\text{CH}_2)_3\text{CO}-\left[\text{U}\right]_n-\text{NHCH}=\text{CH}_2$                       |   |                      |                     |
| $\text{CH}_2=\text{CH}(\text{CH}_2)_2\text{CO}-\left[\text{U}\right]_n-\text{NH}_2$                         | 2 | 604.39               | /                   |
|                                                                                                             | 1 | 363.22               |                     |
|                                                                                                             | 0 | 122.05               |                     |

| Structure                                                                                                  | n | [M+Na <sup>+</sup> ] | [M+H <sup>+</sup> ] |
|------------------------------------------------------------------------------------------------------------|---|----------------------|---------------------|
| $\text{CH}_3\text{CO}-\left[\text{U}\right]_n-\text{NHCH}_2\text{CH}=\text{CH}_2$                          |   |                      |                     |
| $\text{CH}_2=\text{CHCH}_2\text{CO}-\left[\text{U}\right]_n-\text{NH}_2$                                   |   |                      |                     |
| $\text{CH}_3\text{CO}-\left[\text{U}\right]_n-\text{NHCH}=\text{CH}_2$                                     | 2 | 590.37               |                     |
|                                                                                                            | 1 | 349.20               | /                   |
|                                                                                                            | 0 | 108.03               |                     |
| $\text{HCO}-\left[\text{U}\right]_n-\text{NHCH}_2\text{CH}=\text{CH}_2$                                    |   |                      |                     |
| $\text{HCO}(\text{CH}_2)_8\text{CO}-\left[\text{U}\right]_n-\text{NHCH}_2\text{CH}=\text{CH}_2$            | 2 | 730.54               |                     |
|                                                                                                            | 1 | 489.38               | /                   |
|                                                                                                            | 0 | 248.16               |                     |
| $\text{H}_2\text{NCO}(\text{CH}_2)_8\text{CO}-\left[\text{U}\right]_n-\text{NHCH}_2\text{CH}=\text{CH}_2$  | 2 | 745.63               |                     |
|                                                                                                            | 1 | 504.33               | /                   |
|                                                                                                            | 0 | 263.19               |                     |
|                                                                                                            | 3 | 989.68               |                     |
| $\text{HOCO}(\text{CH}_2)_8\text{CO}-\left[\text{U}\right]_n-\text{NH}(\text{CH}_2)_2\text{CH}_3$          | 2 | 748.51               | /                   |
|                                                                                                            | 1 | 507.29               |                     |
|                                                                                                            | 0 | 266.16               |                     |
| $\text{NH}_2\text{CO}(\text{CH}_2)_8\text{CO}-\left[\text{U}\right]_n-\text{O}(\text{CH}_2)_3\text{NH}_2$  | 3 | 1004.78              |                     |
|                                                                                                            | 2 | 763.58               | /                   |
| $\text{CH}_3\text{CH}_2\text{O}-\left[\text{U}\right]_n-\text{CO}(\text{CH}_2)_8\text{COOCH}_2\text{CH}_3$ | 1 | 522.39               |                     |
|                                                                                                            | 0 | 281.25               |                     |
| $\text{CH}_2=\text{CH}(\text{CH}_2)_6\text{CO}-\left[\text{U}\right]_n-\text{OH}$                          |   |                      |                     |
|                                                                                                            | 3 | 902.57               |                     |
| $\text{CH}_2=\text{CH}(\text{CH}_2)_4\text{CO}-\left[\text{U}\right]_n-\text{OCH}_2\text{CH}_3$            | 2 | 661.49               | /                   |
|                                                                                                            | 1 | 420.45               |                     |
|                                                                                                            | 0 | 179.19               |                     |
| $\text{CH}_3(\text{CH}_2)_4\text{CO}-\left[\text{U}\right]_n-\text{OCH}_2\text{CH}=\text{CH}_2$            |   |                      |                     |
| $\text{CH}_2=\text{CH}(\text{CH}_2)_5\text{CO}-\left[\text{U}\right]_n-\text{OH}$                          |   |                      |                     |
| $\text{CH}_3(\text{CH}_2)_3\text{CO}-\left[\text{U}\right]_n-\text{OCH}_2\text{CH}=\text{CH}_2$            | 2 | 647.42               |                     |
|                                                                                                            | 1 | 406.25               | /                   |
|                                                                                                            | 0 | 165.11               |                     |
| $\text{CH}_3(\text{CH}_2)_4\text{CO}-\left[\text{U}\right]_n-\text{OCH}=\text{CH}_2$                       |   |                      |                     |
| $\text{CH}_2=\text{CH}(\text{CH}_2)_3\text{CO}-\left[\text{U}\right]_n-\text{NH}_2$                        | 2 | 618.49               |                     |
|                                                                                                            | 1 | 377.23               | /                   |
|                                                                                                            | 0 | 136.06               |                     |
| $\text{CH}_2=\text{CH}(\text{CH}_2)_4\text{CO}-\left[\text{U}\right]_n-\text{OH}$                          |   |                      |                     |
| $\text{CH}_2=\text{CH}(\text{CH}_2)_2\text{CO}-\left[\text{U}\right]_n-\text{OCH}_2\text{CH}_3$            | 4 | 1115.74              |                     |
|                                                                                                            | 3 | 874.57               |                     |
|                                                                                                            | 2 | 633.40               | /                   |
| $\text{CH}_3(\text{CH}_2)_3\text{CO}-\left[\text{U}\right]_n-\text{OCH}=\text{CH}_2$                       | 1 | 392.23               |                     |
|                                                                                                            | 0 | 151.06               |                     |
| $\text{CH}_3(\text{CH}_2)_2\text{CO}-\left[\text{U}\right]_n-\text{OCH}_2\text{CH}=\text{CH}_2$            |   |                      |                     |
| $\text{CH}_2=\text{CH}(\text{CH}_2)_3\text{CO}-\left[\text{U}\right]_n-\text{OH}$                          |   |                      |                     |
| $\text{CH}_2=\text{CHCH}_2\text{CO}-\left[\text{U}\right]_n-\text{OCH}_2\text{CH}_3$                       | 2 | 619.49               |                     |
|                                                                                                            | 1 | 378.26               | /                   |
|                                                                                                            | 0 | 137.07               |                     |
| $\text{CH}_3(\text{CH}_2)_2\text{CO}-\left[\text{U}\right]_n-\text{OCH}=\text{CH}_2$                       |   |                      |                     |



| Structure                                                                                                                  | n | [M+Na <sup>+</sup> ] | [M+H <sup>+</sup> ] |
|----------------------------------------------------------------------------------------------------------------------------|---|----------------------|---------------------|
| $\text{HOCO}(\text{CH}_2)_8\text{CO}-\left[\text{U}\right]_n-\text{NHCH}=\text{CH}_2$                                      |   |                      |                     |
| $\text{CH}_2=\text{CH}(\text{CH}_2)_6\text{CO}-\left[\text{U}\right]_n-\text{O}(\text{CH}_2)_3\text{NHCO}$                 | 2 | 772.71               |                     |
|                                                                                                                            | 1 | 531.44               | /                   |
|                                                                                                                            | 0 | 290.22               |                     |
|                                                                                                                            | 3 | 1029.69              |                     |
| $\text{CH}_2=\text{CH}(\text{CH}_2)_3\text{CO}-\left[\text{U}\right]_n-\text{O}(\text{CH}_2)_3\text{NHCO}$                 | 2 | 788.52               | /                   |
|                                                                                                                            | 1 | 547.35               |                     |
|                                                                                                                            | 0 | 306.18               |                     |
| $\text{CH}_3(\text{CH}_2)_5\text{CO}-\left[\text{U}\right]_n-\text{O}(\text{CH}_2)_3\text{NHCO}(\text{CH}_2)_3\text{NHCO}$ | 3 | 1031.11              |                     |
| $\text{HOCH}=\text{CHCH}_2\text{NH}-\left[\text{U}\right]_n-\text{CO}(\text{CH}_2)_8\text{CO}$                             | 2 | 790.67               | /                   |
|                                                                                                                            | 1 | 549.38               |                     |
| $\text{HO}(\text{CH}_2)_3\text{NH}-\left[\text{U}\right]_n-\text{CO}(\text{CH}_2)_8\text{COOCH}=\text{CH}_2$               | 0 | 308.21               |                     |
|                                                                                                                            | 3 | 802.51               |                     |
| $\text{CH}_2=\text{CHCO}-\left[\text{U}\right]_n-\text{H}$                                                                 | 2 | 561.34               | /                   |
|                                                                                                                            | 1 | 320.17               |                     |
|                                                                                                                            | 0 | 79.00                |                     |
|                                                                                                                            | 3 | 930.63               |                     |
| $\text{CH}_2=\text{CH}(\text{CH}_2)_6\text{CO}-\left[\text{U}\right]_n-\text{OCH}_2\text{CH}_3$                            | 2 | 689.46               | /                   |
|                                                                                                                            | 1 | 448.31               |                     |
|                                                                                                                            | 0 | 207.14               |                     |

\* U = -NH(CH<sub>2</sub>)<sub>3</sub>OCO(CH<sub>2</sub>)<sub>8</sub>CO- or -O(CH<sub>2</sub>)<sub>3</sub>NHCO(CH<sub>2</sub>)<sub>8</sub>CO-.

**Table S2.** Structure assignment of the degradation products derived from the pyrolysis of the PEA-pro at 350 and 400 °C.

| RT<br>(min)       | Possible structure (Mol Wt)                                                                    | Ion EI <sup>a</sup><br>(m/z) | A% <sup>b</sup><br>350 °C | A% <sup>b</sup><br>400 °C |
|-------------------|------------------------------------------------------------------------------------------------|------------------------------|---------------------------|---------------------------|
| 8.002             | CH <sub>3</sub> (CH <sub>2</sub> ) <sub>4</sub> COOH* (116)                                    | 73                           | /                         | 1.31                      |
| 10.600            | CH <sub>3</sub> (CH <sub>2</sub> ) <sub>7</sub> COOH* (158)                                    | 129                          | /                         | 1.99                      |
| 13.377            | CH <sub>3</sub> (CH <sub>2</sub> ) <sub>4</sub> CONHCH <sub>2</sub> CH=CH <sub>2</sub> * (155) | 140                          | /                         | 0.96                      |
| 13.559            | CH <sub>3</sub> (CH <sub>2</sub> ) <sub>5</sub> CONHCH <sub>2</sub> CH=CH <sub>2</sub> * (169) | 126                          | /                         | 0.63                      |
| 14.900            | unidentified                                                                                   | 99                           | /                         | 0.07                      |
| 15.024            | CH <sub>3</sub> (CH <sub>2</sub> ) <sub>6</sub> CONHCH <sub>2</sub> CH=CH <sub>2</sub> (183)   | 112                          | /                         | 0.43                      |
| 15.154            | unidentified                                                                                   | 168                          | /                         | 1.33                      |
| 16.134            | unidentified                                                                                   | 177                          | 0.28                      | /                         |
| 16.311            | unidentified                                                                                   | 112                          | /                         | 0.15                      |
| 16.422            | unidentified                                                                                   | 112                          | /                         | 0.45                      |
| 17.214/<br>17.189 | HOCO(CH <sub>2</sub> ) <sub>8</sub> COOH (202)                                                 | 138                          | 2.96                      | 12.15                     |
| 19.522/<br>19.513 | NC(CH <sub>2</sub> ) <sub>8</sub> CN (164)                                                     | 164                          | 5.92                      | 2.54                      |
| 20.122            | NC(CH <sub>2</sub> ) <sub>8</sub> CONHCH <sub>2</sub> CH=CH <sub>2</sub> (222)                 | 221                          | /                         | 9.69                      |
| 20.249            | CH <sub>3</sub> (CH <sub>2</sub> ) <sub>6</sub> CONHCH <sub>2</sub> CH=CH <sub>2</sub> (183)   | 183                          | 5.30                      | 0.55                      |
| 21.188/<br>21.158 | NC(CH <sub>2</sub> ) <sub>8</sub> CONHCH=CH <sub>2</sub> (208)                                 | 207                          | 1.28                      | 3.43                      |

| RT<br>(min)       | Possible structure (Mol Wt)                                                                                                                                                                                                                                                                                                                                                               | Ion EI <sup>a</sup><br>( <i>m/z</i> ) | A% <sup>b</sup><br>350 °C | A% <sup>b</sup><br>400 °C |
|-------------------|-------------------------------------------------------------------------------------------------------------------------------------------------------------------------------------------------------------------------------------------------------------------------------------------------------------------------------------------------------------------------------------------|---------------------------------------|---------------------------|---------------------------|
| 22.049/<br>22.024 | $\left[ \text{U} \right]_n$<br>or HOCO(CH <sub>2</sub> ) <sub>8</sub> CONHCH <sub>2</sub> CH=CH <sub>2</sub> (241)                                                                                                                                                                                                                                                                        | 241                                   | 61.83                     | 30.49                     |
| 22.278/<br>22.236 | $\left[ \text{U} \right]_n$<br>or HOCO(CH <sub>2</sub> ) <sub>8</sub> CONHCH <sub>2</sub> CH=CH <sub>2</sub> (241)                                                                                                                                                                                                                                                                        | 241                                   | 3.22                      | 4.76                      |
| 23.100            | CH <sub>2</sub> =CHCH <sub>2</sub> OCO(CH <sub>2</sub> ) <sub>8</sub> CONHCH <sub>2</sub> CH=CH <sub>2</sub> (281)                                                                                                                                                                                                                                                                        | 281                                   | /                         | 2.43                      |
| 23.104            | unidentified                                                                                                                                                                                                                                                                                                                                                                              | 182                                   | 1.52                      | /                         |
| 23.822            | CH <sub>3</sub> CH <sub>2</sub> OCO(CH <sub>2</sub> ) <sub>8</sub> CONHCH <sub>2</sub> CH=CH <sub>2</sub> (269)                                                                                                                                                                                                                                                                           | 269                                   | 0.91                      | /                         |
| 23.963            | unidentified                                                                                                                                                                                                                                                                                                                                                                              | 281                                   | /                         | 1.61                      |
| 24.593            | CH <sub>2</sub> =CHCH <sub>2</sub> NHCO(CH <sub>2</sub> ) <sub>8</sub> CONH(CH <sub>2</sub> ) <sub>3</sub> OH (298)                                                                                                                                                                                                                                                                       | 281                                   | /                         | 2.03                      |
| 25.225/<br>25.218 | CH <sub>3</sub> (CH <sub>2</sub> ) <sub>2</sub> NH(CH <sub>2</sub> ) <sub>3</sub> OCO(CH <sub>2</sub> ) <sub>8</sub> CN (282) or<br>CH <sub>2</sub> =CHCH <sub>2</sub> OCO(CH <sub>2</sub> ) <sub>8</sub> CONHCH <sub>2</sub> CH=CH <sub>2</sub> or<br>CH <sub>2</sub> =CHCH <sub>2</sub> COO(CH <sub>2</sub> ) <sub>3</sub> NHCO(CH <sub>2</sub> ) <sub>6</sub> CH=CH <sub>2</sub> (281) | 265                                   | 10.47                     | 6.73                      |
| 25.880            | CH <sub>3</sub> (CH <sub>2</sub> ) <sub>2</sub> O(CH <sub>2</sub> ) <sub>3</sub> NHCO(CH <sub>2</sub> ) <sub>8</sub> CN (282)                                                                                                                                                                                                                                                             | 281                                   | /                         | 2.36                      |
| 27.284            | unidentified                                                                                                                                                                                                                                                                                                                                                                              | 429                                   | /                         | 0.59                      |
| 27.972            | unidentified                                                                                                                                                                                                                                                                                                                                                                              | 429                                   | /                         | 1.05                      |
| 31.960            | unidentified                                                                                                                                                                                                                                                                                                                                                                              | 429                                   | 6.31                      | /                         |
| 31.972            | unidentified                                                                                                                                                                                                                                                                                                                                                                              | 429                                   | /                         | 12.27                     |

a: Molecular ion or major fragment; b: Area %.
